# Supplementary material
Source: PubMed Central journal article supplement (PMC7710137)

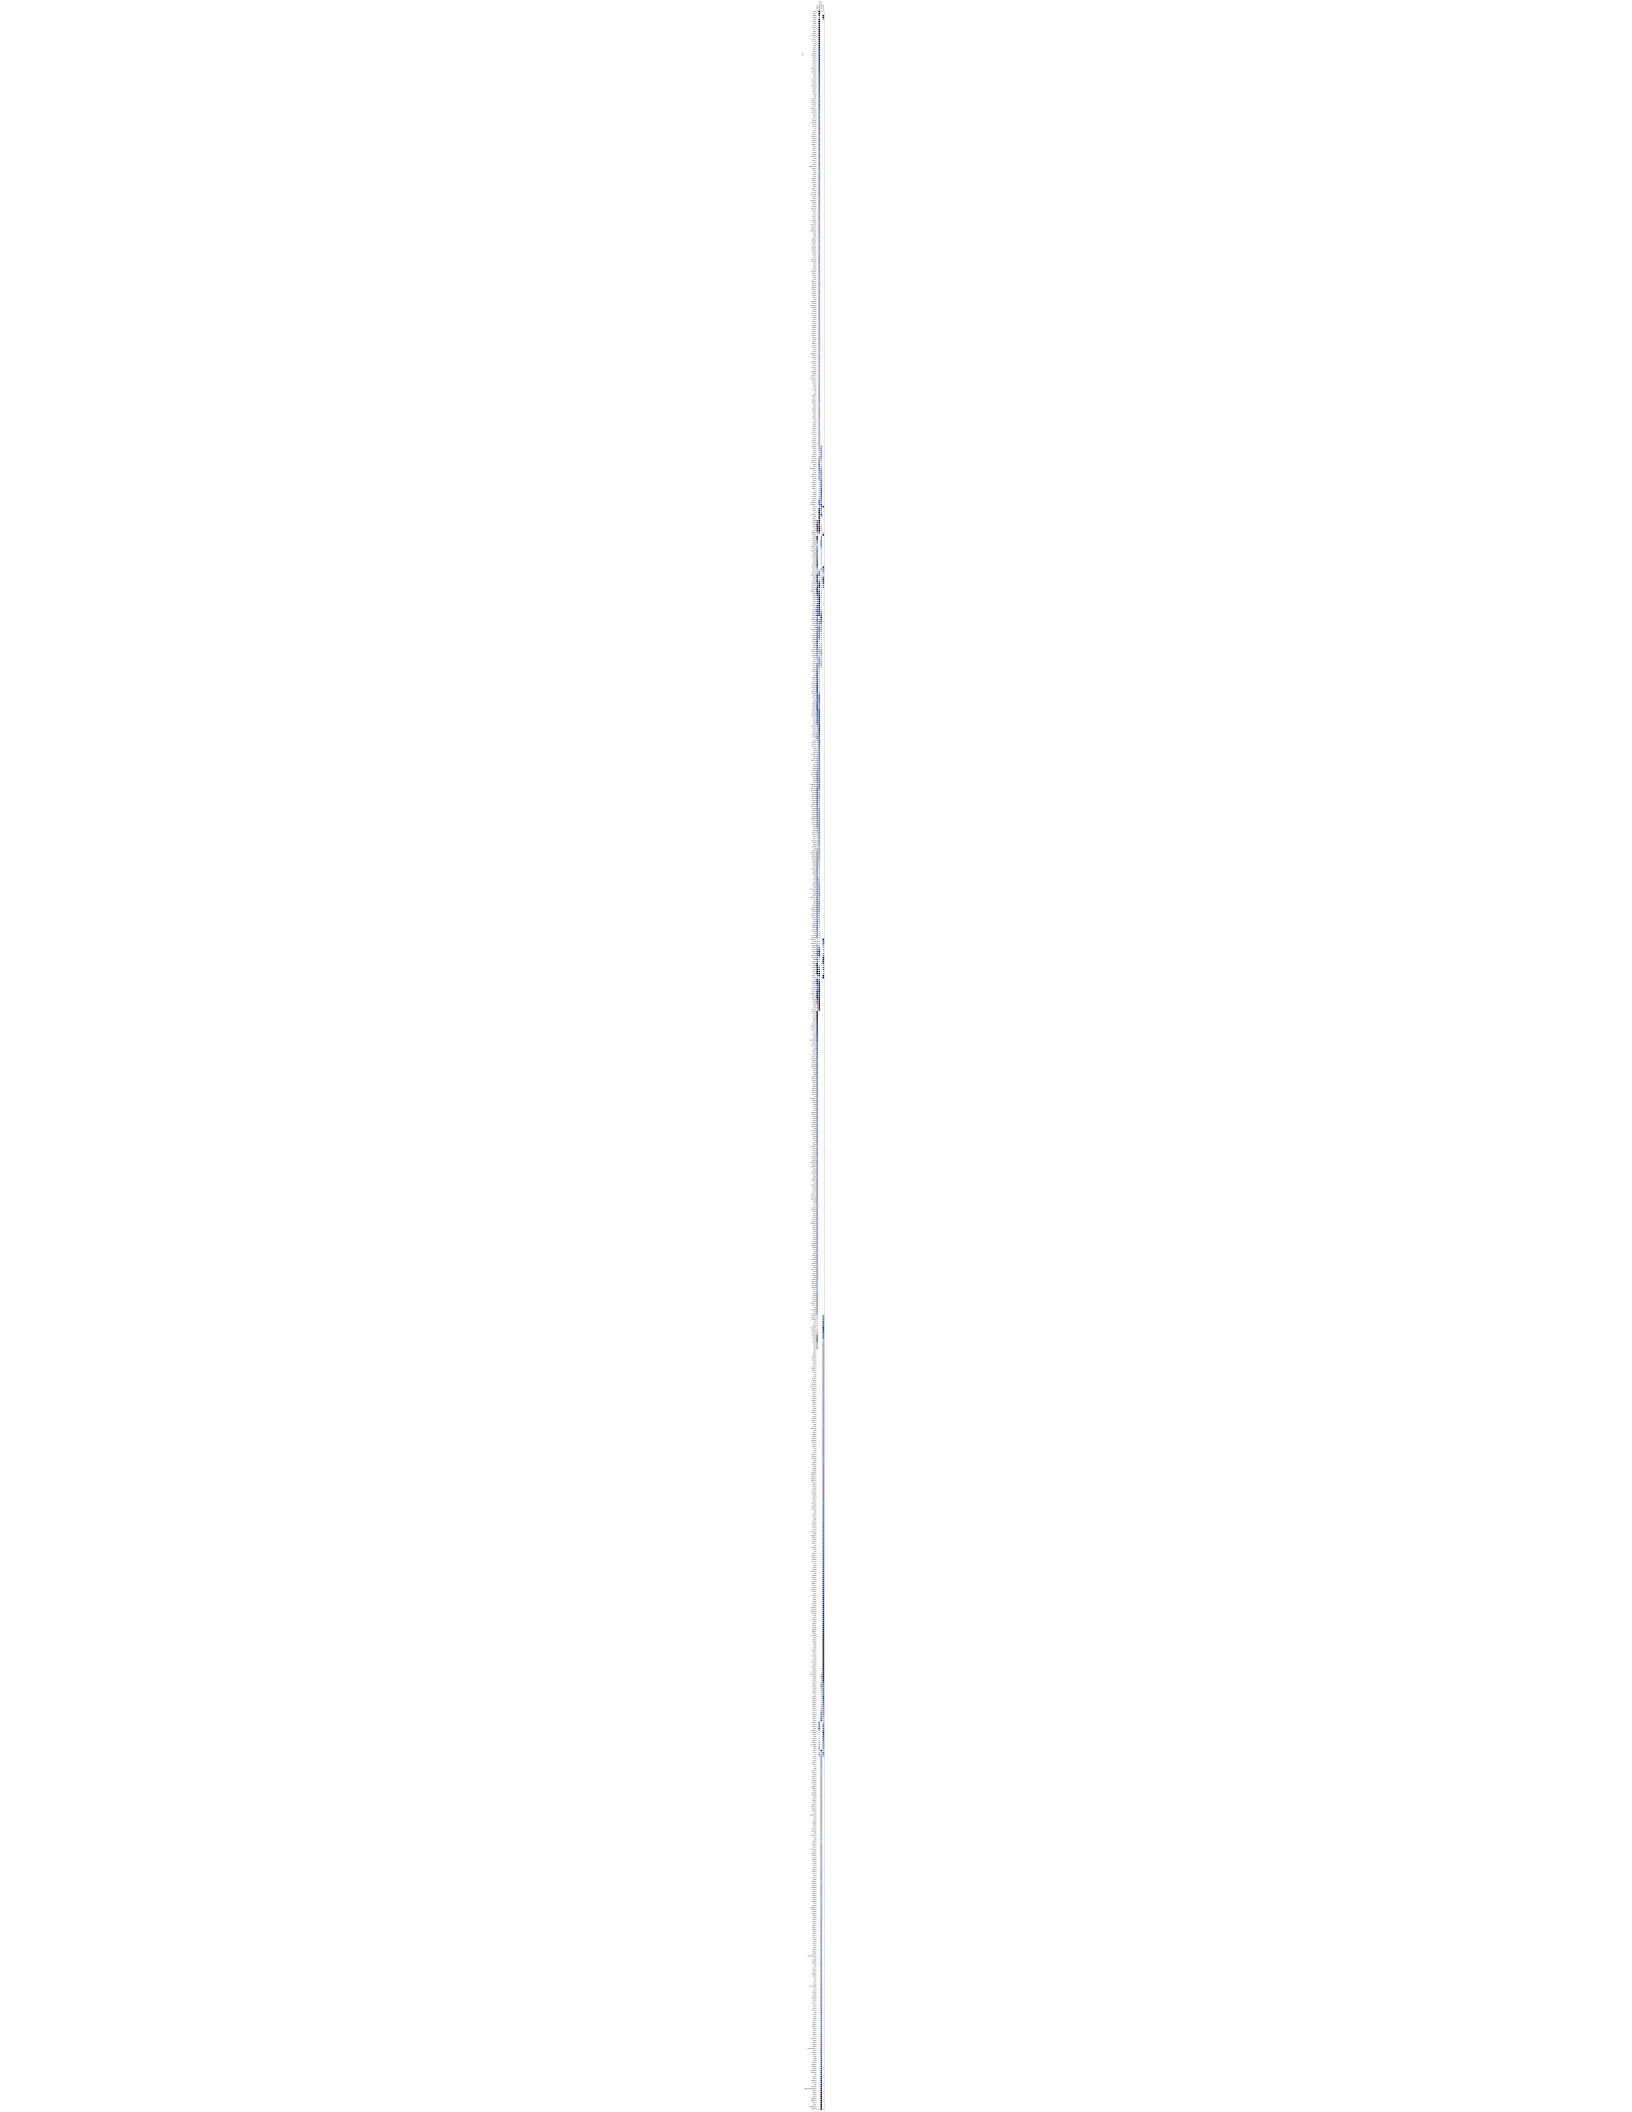

Supplement: 163199_0_supp_588769_qfyr7k.pdf [file 163199_0_supp_588769_qfyr7k.pdf]
